# Supplementary material for: A Systematic Review on Caries Status of Older Adults
Source: MDPI journal article supplement (doi:10.3390/ijerph182010662), 2021-10-12
Supplement: s1 [file s1]

## Search strategy in all databases

### Pubmed (n=1243)

((prevalence) AND ((((((caries) OR (dental caries)) OR (tooth decay)) OR (root caries)) OR (DMF)))) AND (((((elderly) OR (older)) OR (aged)) OR (aging)) OR (senior)) AND ((2016/1/1:2020/12/31[pdat]) AND (english[Filter]))

### Scopus (n= 1378)

((TITLE-ABS-KEY(elderly) OR TITLE-ABS-KEY(senior) OR TITLE-ABS-KEY(aging) OR TITLE-ABS-KEY(aged) OR TITLE-ABS-KEY(older))) AND (TITLE-ABS-KEY(prevalence)) And ((TITLE-ABS-KEY(caries) OR TITLE-ABS-KEY("dental caries") OR TITLE-ABS-KEY("root caries") OR TITLE-ABS-KEY("tooth decay") OR TITLE-ABS-KEY(DMF))) AND ( LIMIT-TO ( PUBYEAR,2020) OR LIMIT-TO ( PUBYEAR,2019) OR LIMIT-TO ( PUBYEAR,2018) OR LIMIT-TO ( PUBYEAR,2017) OR LIMIT-TO ( PUBYEAR,2016) ) AND ( LIMIT-TO ( LANGUAGE,"English" ) )

### Embase (n=889)

(aged or elderly or ageing or senior or older) and (caries or "dental caries" or "tooth decay" or "root caries" or DMF) and prevalence.af.(english language and yr="2016 - 2020")

### WOS (n=1753)

(All=(senior) OR ALL=(aged) OR ALL=(aging) OR ALL=(elderly) OR ALL=(older)) AND (ALL=(caries) OR ALL=("dental caries") OR ALL=("root caries") OR ALL=("tooth decay") OR ALL=("DMF")) AND (ALL=prevalence) AND **LANGUAGE:** (English)

*Indexes=SCI-EXPANDED, SSCI, A&HCI, CPCI-S, CPCI-SSH, ESCI Timespan=2016-2-20*
